# Supplementary material for: Visible-light-induced regioselective sulfenylation of imidazopyridines with thiols under transition metal-free conditions
Source: Royal Society of Chemistry journal article supplement (doi:10.1039/c7gc02906c), 2017-12-01
Supplement: c7gc02906c4.pdf [file c7gc02906c4.pdf]

## Qualitative Analysis Report

|                               |                                  |                      |                       |
|-------------------------------|----------------------------------|----------------------|-----------------------|
| <b>Data Filename</b>          | RL-1811P-9.d                     | <b>Sample Name</b>   | RL-1811P-9            |
| <b>Sample Type</b>            | Sample                           | <b>Position</b>      | Vial 12               |
| <b>Instrument Name</b>        | Agilent 6530 Accurate-Mass Q-TOF | <b>User Name</b>     |                       |
| <b>Acq Method</b>             | Direct Mass-2017.m               | <b>Acquired Time</b> | 18-Nov-17 10:02:19 PM |
| <b>IRM Calibration Status</b> | Success                          | <b>DA Method</b>     | Direct Mass.m         |
| <b>Comment</b>                |                                  |                      |                       |

|                       |                             |              |  |
|-----------------------|-----------------------------|--------------|--|
| <b>Sample Group</b>   |                             | <b>Info.</b> |  |
| <b>Acquisition SW</b> | 6200 series TOF/6500 series |              |  |
| <b>Version</b>        | Q-TOF B.05.00 (B5042.1)     |              |  |

### User Chromatograms

Fragmentor Voltage 118 Collision Energy 0 Ionization Mode ESI

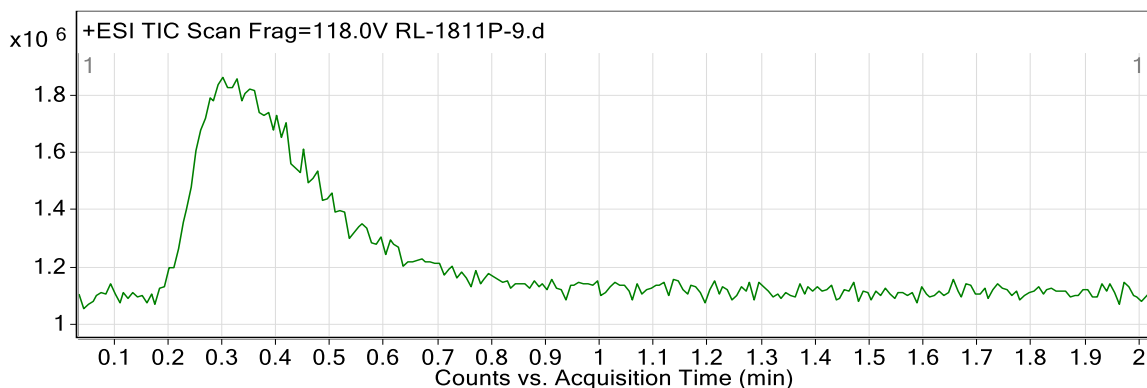

### User Spectra

Fragmentor Voltage 118 Collision Energy 0 Ionization Mode ESI

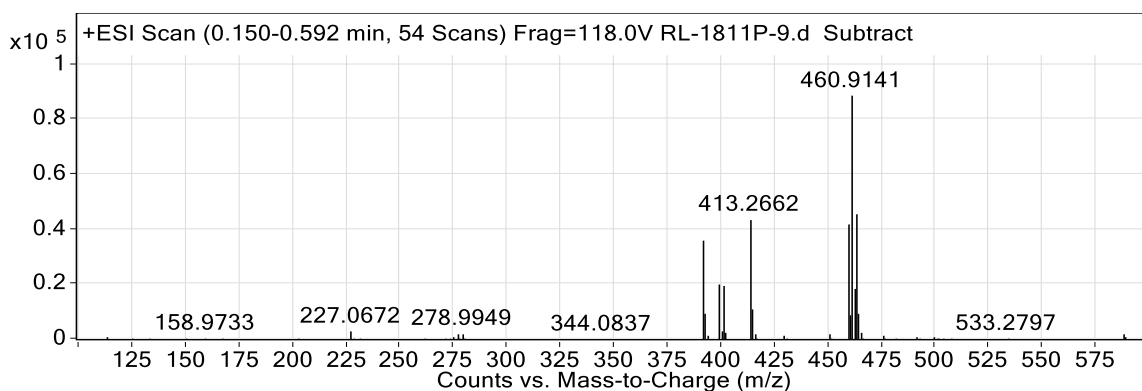

#### Peak List

| m/z      | z | Abund    |
|----------|---|----------|
| 391.2842 | 1 | 35868.41 |
| 398.8985 | 1 | 20342.64 |
| 400.8965 | 1 | 19763.88 |
| 413.2662 | 1 | 43755.36 |
| 414.2695 | 1 | 11196.37 |
| 458.916  | 1 | 41869.52 |
| 460.9141 | 1 | 88739.54 |
| 461.9168 | 1 | 18617.18 |

# Qualitative Analysis Report

|          |   |          |
|----------|---|----------|
| 462.912  | 1 | 45805.45 |
| 463.9147 | 1 | 9713.94  |

## Compounds

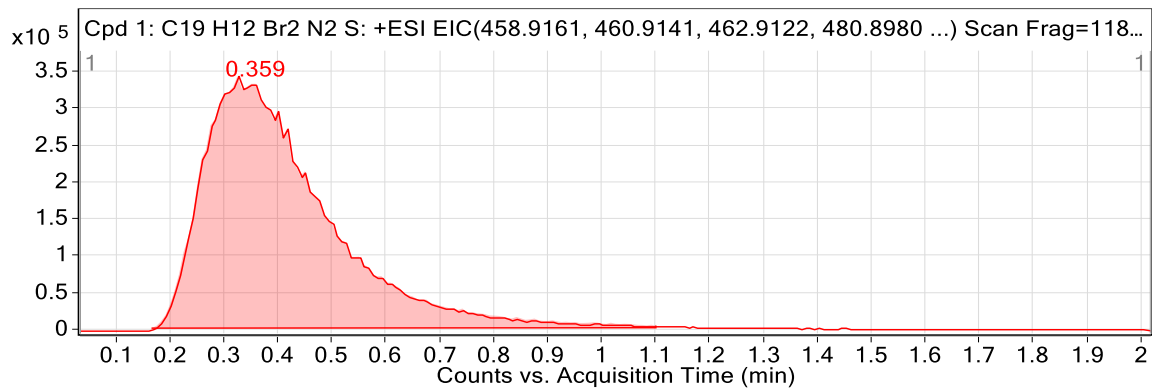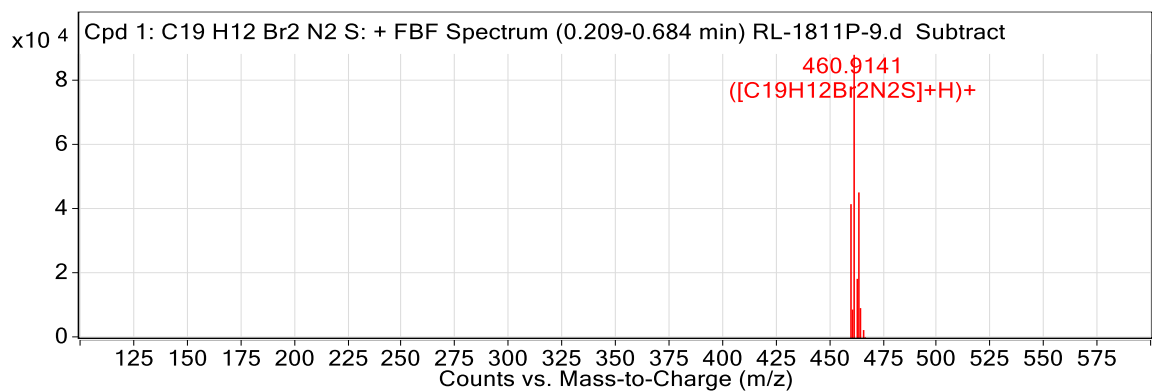

--- End Of Report ---
