# Supplementary material for: Visible-light-induced regioselective sulfenylation of imidazopyridines with thiols under transition metal-free conditions
Source: Royal Society of Chemistry journal article supplement (doi:10.1039/c7gc02906c), 2017-12-01
Supplement: c7gc02906c5.pdf [file c7gc02906c5.pdf]

## Qualitative Analysis Report

|                               |                                  |                      |                      |
|-------------------------------|----------------------------------|----------------------|----------------------|
| <b>Data Filename</b>          | RL-1811P-3.d                     | <b>Sample Name</b>   | RL-1811P-3           |
| <b>Sample Type</b>            | Sample                           | <b>Position</b>      | Vial 11              |
| <b>Instrument Name</b>        | Agilent 6530 Accurate-Mass Q-TOF | <b>User Name</b>     |                      |
| <b>Acq Method</b>             | Direct Mass-2017.m               | <b>Acquired Time</b> | 18-Nov-17 9:58:50 PM |
| <b>IRM Calibration Status</b> | Success                          | <b>DA Method</b>     | Direct Mass.m        |
| <b>Comment</b>                |                                  |                      |                      |

|                       |                             |
|-----------------------|-----------------------------|
| <b>Sample Group</b>   | <b>Info.</b>                |
| <b>Acquisition SW</b> | 6200 series TOF/6500 series |
| <b>Version</b>        | Q-TOF B.05.00 (B5042.1)     |

### User Chromatograms

Fragmentor Voltage 118    Collision Energy 0    Ionization Mode ESI

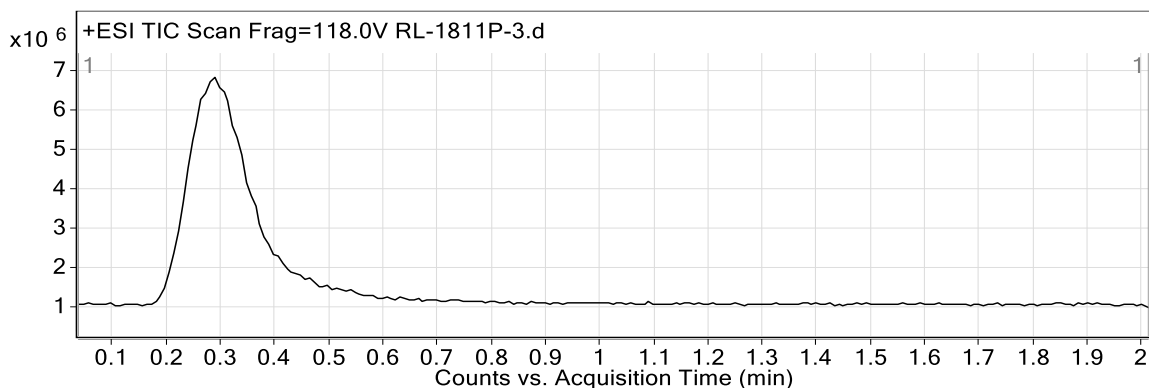

### User Spectra

Fragmentor Voltage 118    Collision Energy 0    Ionization Mode ESI

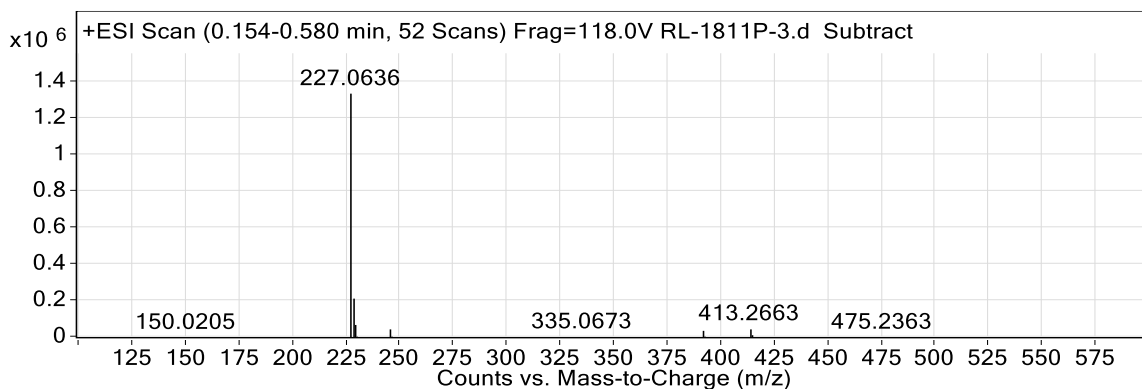

#### Peak List

| m/z      | z | Abund      |
|----------|---|------------|
| 227.0636 | 1 | 1336574.63 |
| 227.2007 |   | 45916.92   |
| 228.0667 | 1 | 218725.14  |
| 229.0617 | 1 | 71727.85   |
| 230.0631 | 1 | 9395.13    |
| 244.9568 | 1 | 49100.3    |
| 391.2843 | 1 | 42995.73   |
| 392.2878 | 1 | 11286.09   |

# Qualitative Analysis Report

|          |   |          |
|----------|---|----------|
| 413.2663 | 1 | 48026.02 |
| 414.2695 | 1 | 12186.33 |

## Compounds

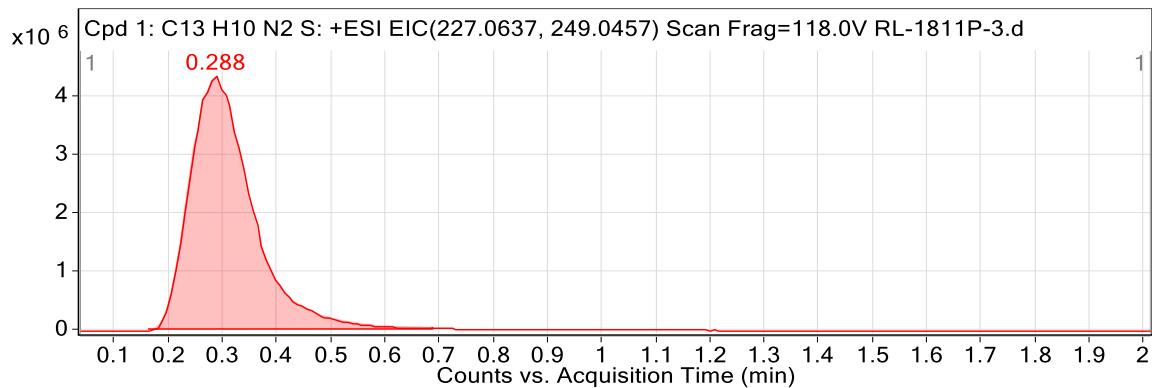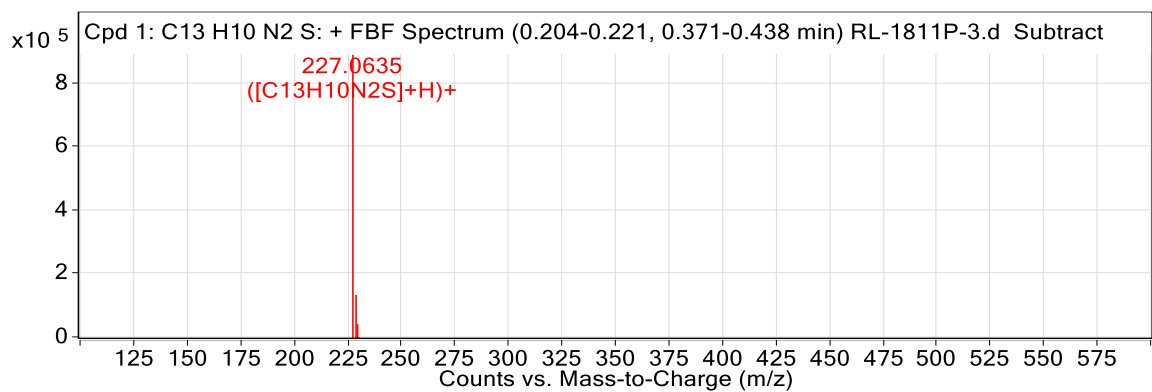

--- End Of Report ---
